# Supplementary material for: Dynamic Expression, Differential Regulation and Functional Diversity of the CNGC Family Genes in Cotton
Source: MDPI journal article supplement (doi:10.3390/ijms23042041), 2022-02-12
Supplement: s1 [file s1]

**Table S2.** List of the CNGC family genes in *Gossypium hirsutum*.

| Gene Name       | Gene ID         | Chr:Location(strand)               | AA   | pI   | D&M       | Group | Subcellular Localization |
|-----------------|-----------------|------------------------------------|------|------|-----------|-------|--------------------------|
| <i>GhCNGC1</i>  | Gh_A01G0520     | A01:8277150..8284315(+)            | 709  | 9.02 | a,b,c,d   | IV-B  | Plasma membrane          |
| <i>GhCNGC2</i>  | Gh_A01G1841     | A01:98325294..98327741(+)          | 701  | 8.99 | a,b,c,d   | III   | Plasma membrane          |
| <i>GhCNGC3</i>  | Gh_A03G0266     | A03:4244529..4247150(+)            | 703  | 9.10 | a,b,c,d   | III   | Plasma membrane          |
| <i>GhCNGC4</i>  | Gh_A05G0448     | A05:4940335..4941778(-)            | 313  | 9.17 | b,d,e     | II    | Nuclear                  |
| <i>GhCNGC5</i>  | Gh_A05G0903     | A05:8902041..8905061(-)            | 713  | 9.21 | a,b,c,d   | III   | Plasma membrane          |
| <i>GhCNGC6</i>  | Gh_A05G1012     | A05:10147786..10152216(+)          | 748  | 8.95 | a,b,c,d,e | II    | Plasma membrane          |
| <i>GhCNGC7</i>  | Gh_A05G3130     | A05:80780849..80783618(-)          | 736  | 8.37 | a,b,c,d   | III   | Plasma membrane          |
| <i>GhCNGC8</i>  | Gh_A05G3196     | A05:83677517..83680754(-)          | 695  | 9.33 | a,b,c,d   | IV-B  | Plasma membrane          |
| <i>GhCNGC9</i>  | Gh_A05G3588     | A05:91763003..91768450(+)          | 695  | 9.30 | a,b,c,d,e | I     | Plasma membrane          |
| <i>GhCNGC10</i> | Gh_NAU_A06*     | A06:41590465..41594219(-)          | 709  | 9.11 | a,b,c,d   | III   | Plasma membrane          |
| <i>GhCNGC11</i> | Gh_A07G1267     | A07:29283930..29286198(-)          | 599  | 9.23 | a,b,c,d   | I     | Plasma membrane          |
| <i>GhCNGC12</i> | Gh_A09G0110     | A09:2549787..2554380(-)            | 524  | 9.35 | a,b,d     | IV-B  | Plasma membrane          |
| <i>GhCNGC13</i> | Gh_A09G0111     | A09:2575761..2581410(+)            | 766  | 9.57 | a,b,c,d   | IV-B  | Plasma membrane          |
| <i>GhCNGC14</i> | Gh_A11G0014     | A11:194792..217283(-)              | 786  | 8.84 | a,b,c,d   | IV-A  | Plasma membrane          |
| <i>GhCNGC15</i> | Gh_A12G1004     | A12:61310236..61315344(+)          | 708  | 9.59 | a,b,c,d,e | I     | Plasma membrane          |
| <i>GhCNGC16</i> | Gh_A13G1579     | A13:74640085..74642700(+)          | 703  | 8.95 | a,b,c,d   | III   | Plasma membrane          |
| <i>GhCNGC17</i> | Gh_A13G1614     | A13:74974260..74978836(+)          | 743  | 9.02 | a,b,c,d,e | II    | Plasma membrane          |
| <i>GhCNGC18</i> | Gh_D01G0533     | D01:6643589..6650779(+)            | 709  | 9.02 | a,b,c,d   | IV-B  | Plasma membrane          |
| <i>GhCNGC19</i> | Gh_D01G2082     | D01:59853608..59856045(+)          | 726  | 8.92 | a,b,c,d   | III   | Plasma membrane          |
| <i>GhCNGC20</i> | Gh_D03G1301     | D03:41182870..41185544(-)          | 721  | 9.01 | a,b,c,d   | III   | Plasma membrane          |
| <i>GhCNGC21</i> | Gh_D04G0016     | D04:336247..341449(-)              | 729  | 9.00 | a,b,c,d   | I     | Plasma membrane          |
| <i>GhCNGC22</i> | Gh_D04G0409     | D04:6457085..6464147(+)            | 631  | 9.48 | a,b,c,d   | IV-B  | Plasma membrane          |
| <i>GhCNGC23</i> | Gh_D04G0507     | D04:8647485..8650049(+)            | 740  | 6.89 | a,b,c,d   | III   | Plasma membrane          |
| <i>GhCNGC24</i> | Gh_D04G0818     | D04:18542044..18548380(-)          | 731  | 9.29 | a,b,c,d   | III   | Plasma membrane          |
| <i>GhCNGC25</i> | Gh_D05G0547     | D05:4438080..4442575(+)            | 738  | 9.20 | a,b,c,d,e | II    | Plasma membrane          |
| <i>GhCNGC26</i> | Gh_D05G0985     | D05:8298111..8301011(-)            | 710  | 9.18 | a,b,c,d   | III   | Plasma membrane          |
| <i>GhCNGC27</i> | Gh_D05G1129     | D05:9678476..9682896(+)            | 746  | 9.00 | a,b,c,d,e | II    | Plasma membrane          |
| <i>GhCNGC28</i> | Gh_D06G1113     | D06:25415590..25424220(-)          | 885  | 9.47 | a,b,c,d   | III   | Plasma membrane          |
| <i>GhCNGC29</i> | Gh_D07G1377     | D07:22261532..22264949(-)          | 734  | 9.29 | a,b,c,d   | I     | Plasma membrane          |
| <i>GhCNGC30</i> | Gh_D08G1044     | D08:29136722..29142273(-)          | 753  | 8.83 | a,b,c,d   | I     | Plasma membrane          |
| <i>GhCNGC31</i> | Gh_D09G0106     | D09:2641533..2647632(-)            | 695  | 9.31 | a,b,c,d   | IV-B  | Plasma membrane          |
| <i>GhCNGC32</i> | Gh_D09G0107     | D09:2667426..2672270(+)            | 766  | 9.57 | a,b,c,d   | IV-B  | Plasma membrane          |
| <i>GhCNGC33</i> | Gh_D09G1606     | D09:43634992..43640328(-)          | 1057 | 9.06 | a,b,c,d   | III   | Plasma membrane          |
| <i>GhCNGC34</i> | Gh_D11G0011     | D11:161114..174077(-)              | 770  | 9.20 | a,b,c,d   | IVA   | Plasma membrane          |
| <i>GhCNGC35</i> | Gh_D12G1124     | D12:38003265..38008325(+)          | 719  | 9.51 | a,b,c,d   | I     | Plasma membrane          |
| <i>GhCNGC36</i> | Gh_D13G1938     | D13:54757524..54759628(+)          | 586  | 9.12 | a,b,c,d   | III   | Plasma membrane          |
| <i>GhCNGC37</i> | Gh_D13G1974     | D13:55088065..55092625(+)          | 743  | 8.97 | a,b,c,d,e | II    | Plasma membrane          |
| <i>GhCNGC38</i> | Gh_A05G3666     | scaffold1170_A05:953138..958831(+) | 738  | 9.34 | a,b,c,d   | III   | Plasma membrane          |
| <i>GhCNGC39</i> | Gh_A09G2401     | scaffold2299_A09:87921..90512(+)   | 692  | 9.06 | a,b,c,d   | III   | Plasma membrane          |
| <i>GhCNGC40</i> | Gh_Sca006927G01 | scaffold6927:5643..9514(-)         | 513  | 8.72 | a,b,c,d   | I     | Chloroplast              |

Note: *Gossypium hirsutum* ((AD)<sub>1</sub>) genome NAU-NBI Assembly v1.1 & Annotation v1.1.

Chr:Location(strand): chromosome & location (start..end) & strand.

AA: amino acids.

pI: isoelectric point.

D&M: domains & motif. a, transmembrane domains (TM); b, cyclic nucleotide-binding domain (CNBD) (InterPro: IPR000595, IPR018490); c, ion transport domain (ITP) (InterPro: IPR005821); d, plant CNGC-specific motif spanning the putative phosphate binding cassette (PBC) and the hinge within the CNBD (Zelman et al. *Front Plant Sci.* 2012, 3:95); e, IQ motif, EF-hand binding site (InterPro: IPR000048).

Group: phylogenetic classification in Figure 1.

**Table S3.** List of the CNGC family genes in *Gossypium barbadense*.

| Gene Name       | Gene ID                  | Chr:Location(strand)          | AA  | pI    | D&M       | Group | Subcellular Localization |
|-----------------|--------------------------|-------------------------------|-----|-------|-----------|-------|--------------------------|
| <i>GbCNGC1</i>  | Gbar_A01G006020          | A01:8697293..8705568(+)       | 709 | 8.76  | a,b,c,d   | IV-B  | Plasma membrane          |
| <i>GbCNGC2</i>  | Gbar_A01G021190          | A01:113941390..113944341(+)   | 698 | 8.98  | a,b,c,d   | III   | Plasma membrane          |
| <i>GbCNGC3</i>  | Gbar_A03G003890          | A03:5102061..5105287(+)       | 686 | 9.35  | a,b,c,d   | III   | Plasma membrane          |
| <i>GbCNGC4</i>  | Gbar_A05G005290          | A05:5025709..5027152(-)       | 313 | 9.59  | b,d,e     | II    | Nuclear                  |
| <i>GbCNGC5</i>  | Gbar_A05G010100          | A05:9148299..9152654(-)       | 713 | 9.33  | a,b,c,d   | III   | Plasma membrane          |
| <i>GbCNGC6</i>  | Gbar_A05G034890          | A05:83328986..83336012(+)     | 731 | 9.63  | a,b,c,d   | III   | Plasma membrane          |
| <i>GbCNGC7</i>  | Gbar_A05G036490          | A05:91999822..92002717(-)     | 719 | 7.64  | a,b,c,d   | III   | Plasma membrane          |
| <i>GbCNGC8</i>  | Gbar_A05G037420          | A05:94694789..94698128(-)     | 695 | 9.45  | a,b,c,d   | IV-B  | Plasma membrane          |
| <i>GbCNGC9</i>  | Gbar_A05G041690          | A05:102314038..102319578(+)   | 712 | 9.13  | a,b,c,d   | I     | Plasma membrane          |
| <i>GbCNGC10</i> | Gbar_A06G011120          | A06:42300192..42307280(-)     | 709 | 9.11  | a,b,c,d   | III   | Plasma membrane          |
| <i>GbCNGC11</i> | Gbar_A07G014600          | A07:29744624..29748343(-)     | 718 | 9.77  | a,b,c,d,e | I     | Plasma membrane          |
| <i>GbCNGC12</i> | Gbar_A08G010210          | A08:49311693..49318179(-)     | 708 | 9.16  | a,b,c,d   | I     | Plasma membrane          |
| <i>GbCNGC13</i> | Gbar_A09G001260          | A09:2601895..2607487(-)       | 688 | 9.34  | a,b,c,d   | IV-B  | Plasma membrane          |
| <i>GbCNGC14</i> | Gbar_A09G001270          | A09:2635374..2641554(+)       | 766 | 9.90  | a,b,c,d   | IV-B  | Plasma membrane          |
| <i>GbCNGC15</i> | Gbar_A09G018060          | A09:70042981..70046031(-)     | 692 | 9.01  | a,b,c,d   | III   | Plasma membrane          |
| <i>GbCNGC16</i> | Gbar_A12G012100          | A12:74687268..74693244(+)     | 708 | 10.06 | a,b,c,d,e | I     | Plasma membrane          |
| <i>GbCNGC17</i> | Gbar_A13G019770          | A13:103498649..103502436(+)   | 727 | 9.17  | a,b,c,d   | III   | Plasma membrane          |
| <i>GbCNGC18</i> | Gbar_A13G020140          | A13:103833121..103839357(+)   | 743 | 9.04  | a,b,c,d,e | II    | Plasma membrane          |
| <i>GbCNGC19</i> | Gbar_D01G006380          | D01:8215486..8223064(+)       | 709 | 8.80  | a,b,c,d   | IV-B  | Plasma membrane          |
| <i>GbCNGC20</i> | Gbar_D03G014500          | D03:46018646..46022630(-)     | 708 | 9.28  | a,b,c,d   | III   | Plasma membrane          |
| <i>GbCNGC21</i> | Gbar_D04G000200          | D04:262035..268826(-)         | 712 | 9.13  | a,b,c,d   | I     | Plasma membrane          |
| <i>GbCNGC22</i> | Gbar_D04G004780          | D04:6645898..6649036(+)       | 679 | 9.71  | a,b,c,d   | IV-B  | Plasma membrane          |
| <i>GbCNGC23</i> | Gbar_D04G005720          | D04:8764155..8767091(+)       | 714 | 6.96  | a,b,c,d   | III   | Plasma membrane          |
| <i>GbCNGC24</i> | Gbar_D04G009040          | D04:18371339..18378487(-)     | 731 | 9.57  | a,b,c,d   | III   | Plasma membrane          |
| <i>GbCNGC25</i> | Gbar_D05G005530          | D05:4464122..4470130(+)       | 736 | 9.30  | a,b,c,d,e | II    | Plasma membrane          |
| <i>GbCNGC26</i> | Gbar_D05G010670          | D05:8644929..8649959(-)       | 713 | 9.26  | a,b,c,d   | III   | Plasma membrane          |
| <i>GbCNGC27</i> | Gbar_D05G012040          | D05:10081285..10086992(+)     | 746 | 9.06  | a,b,c,d,e | II    | Plasma membrane          |
| <i>GbCNGC28</i> | Gbar_D06G011530          | D06:24826696..24831210(-)     | 588 | 9.24  | a,b,c,d   | III   | Plasma membrane          |
| <i>GbCNGC29</i> | Gbar_D07G015050          | D07:22779814..22782638(-)     | 712 | 9.71  | a,b,c,d,e | I     | Plasma membrane          |
| <i>GbCNGC30</i> | Gbar_D08G011030          | D08:30426796..30433111(+)     | 708 | 9.22  | a,b,c,d   | I     | Plasma membrane          |
| <i>GbCNGC31</i> | Gbar_D09G001180          | D09:2506003..2512155(-)       | 688 | 9.40  | a,b,c,d   | IV-B  | Plasma membrane          |
| <i>GbCNGC32</i> | Gbar_D09G001190          | D09:2531299..2536464(+)       | 694 | 9.71  | a,b,c,d   | IV-B  | Plasma membrane          |
| <i>GbCNGC33</i> | Gbar_D09G017790          | D09:44186045..44188613(-)     | 637 | 8.90  | a,b,d     | III   | Plasma membrane          |
| <i>GbCNGC34</i> | Gbar_D11G000120          | D11:131979..146215(-)         | 770 | 9.24  | a,b,c,d   | IV-A  | Plasma membrane          |
| <i>GbCNGC35</i> | Gbar_D12G012180          | D12:37968793..37974717(+)     | 719 | 10.04 | a,b,c,d,e | I     | Plasma membrane          |
| <i>GbCNGC36</i> | Gbar_D13G019920          | D13:54336903..54339837(+)     | 560 | 9.33  | a,b,c,d   | III   | Plasma membrane          |
| <i>GbCNGC37</i> | Gbar_D13G020320          | D13:54643343..54649570(+)     | 743 | 8.96  | a,b,c,d,e | II    | Plasma membrane          |
| <i>GbCNGC38</i> | Gbar_D01G024300          | Scaffold2826:49768..52446(+)  | 706 | 8.81  | a,b,c,d   | III   | Plasma membrane          |
| <i>GbCNGC39</i> | Gbar_D11G035610          | Scaffold2800:97663..116444(+) | 738 | 9.24  | a,b,c,d   | IV-A  | Plasma membrane          |
| <i>GbCNGC40</i> | Gbar_Scaffold3324G000020 | Scaffold3324:18011..22438(+)  | 748 | 8.89  | a,b,c,d,e | II    | Plasma membrane          |
| <i>GbCNGC41</i> | Gbar_Scaffold863G000020  | Scaffold863:4569..8992(+)     | 748 | 8.89  | a,b,c,d,e | II    | Plasma membrane          |

Note: *Gossypium barbadense* ((AD)<sub>2</sub>) genome HAU Assembly v2.0 & Annotation v1.0.

Chr:Location(strand): chromosome & location (start..end) & strand.

AA: amino acids.

pI: isoelectric point.

D&M: domains & motif. a, transmembrane domains (TM); b, cyclic nucleotide-binding domain (CNBD) (InterPro: IPR000595, IPR018490); c, ion transport domain (ITP) (InterPro: IPR005821); d, plant CNGC-specific motif spanning the putative phosphate binding cassette (PBC) and the hinge within the CNBD (Zelman et al. *Front Plant Sci.* 2012, 3:95); e, IQ motif, EF-hand binding site (InterPro: IPR000048).

Group: phylogenetic classification in Figure 1.

**Table S4.** List of the CNGC family genes in *Gossypium arboreum*.

| Gene Name       | Gene ID   | Chr:Location(strand)          | AA  | pI   | D&M       | Group | Subcellular Localization |
|-----------------|-----------|-------------------------------|-----|------|-----------|-------|--------------------------|
| <i>GaCNGC1</i>  | Ga01G0732 | Chr01:9914558..9921711(+)     | 709 | 8.93 | a,b,c,d   | IVB   | Plasma membrane          |
| <i>GaCNGC2</i>  | Ga01G2411 | Chr01:107207852..107210607(+) | 708 | 9.16 | a,b,c,d   | III   | Plasma membrane          |
| <i>GaCNGC3</i>  | Ga02G1657 | Chr02:97749586..97752188(+)   | 715 | 8.96 | a,b,c,d   | III   | Plasma membrane          |
| <i>GaCNGC4</i>  | Ga04G0852 | Chr04:23568369..23572259(-)   | 709 | 9.21 | a,b,c,d,e | I     | Plasma membrane          |
| <i>GaCNGC5</i>  | Ga04G1517 | Chr04:86898684..86901259(-)   | 717 | 7.52 | a,b,c,d   | III   | Plasma membrane          |
| <i>GaCNGC6</i>  | Ga04G1626 | Chr04:90143417..90146638(-)   | 695 | 9.37 | a,b,c,d   | IVB   | Plasma membrane          |
| <i>GaCNGC7</i>  | Ga04G2110 | Chr04:98071052..98076588(+)   | 712 | 9.10 | a,b,c,d   | I     | Plasma membrane          |
| <i>GaCNGC8</i>  | Ga05G0572 | Chr05:5145230..5149709(+)     | 738 | 9.11 | a,b,c,d,e | II    | Plasma membrane          |
| <i>GaCNGC9</i>  | Ga05G1104 | Chr05:9506677..9509703(-)     | 713 | 9.19 | a,b,c,d   | III   | Plasma membrane          |
| <i>GaCNGC10</i> | Ga05G1255 | Chr05:11108037..11112466(+)   | 748 | 8.90 | a,b,c,d,e | II    | Plasma membrane          |
| <i>GaCNGC11</i> | Ga06G1223 | Chr06:47404847..47410039(-)   | 714 | 8.93 | a,b,c,d   | III   | Plasma membrane          |
| <i>GaCNGC12</i> | Ga08G1175 | Chr08:65285350..65290913(-)   | 753 | 8.89 | a,b,c,d   | I     | Plasma membrane          |
| <i>GaCNGC13</i> | Ga09G0093 | Chr09:2006369..2013520(+)     | 712 | 9.45 | a,b,c,d   | IVB   | Plasma membrane          |
| <i>GaCNGC14</i> | Ga09G0167 | Chr09:3622561..3627663(-)     | 695 | 9.22 | a,b,c,d   | IVB   | Plasma membrane          |
| <i>GaCNGC15</i> | Ga09G1844 | Chr09:76172097..76174688(-)   | 692 | 9.06 | a,b,c,d   | III   | Plasma membrane          |
| <i>GaCNGC16</i> | Ga11G4114 | Chr11:124328652..124350352(+) | 770 | 9.22 | a,b,c,d   | IVA   | Plasma membrane          |
| <i>GaCNGC17</i> | Ga12G1804 | Chr12:29109060..29114159(-)   | 708 | 9.58 | a,b,c,d,e | I     | Plasma membrane          |
| <i>GaCNGC18</i> | Ga13G2256 | Chr13:117824620..117828265(+) | 705 | 9.05 | a,b,c,d   | III   | Plasma membrane          |
| <i>GaCNGC19</i> | Ga13G2293 | Chr13:118190385..118194964(+) | 743 | 9.06 | a,b,c,d,e | II    | Plasma membrane          |
| <i>GaCNGC20</i> | Ga14G2437 | Tig00021276:18324..24625(+)   | 731 | 9.32 | a,b,c,d   | III   | Plasma membrane          |

Note: *Gossypium arboreum* (A<sub>2</sub>) genome CRI Assembly v1.0 & Annotation v1.0.

Chr:Location(strand): chromosome & location (start..end) & strand.

AA: amino acids.

pI: isoelectric point.

D&M: domains & motif. a, transmembrane domains (TM); b, cyclic nucleotide-binding domain (CNBD) (InterPro: IPR000595, IPR018490); c, ion transport domain (ITP) (InterPro: IPR005821); d, plant CNGC-specific motif spanning the putative phosphate binding cassette (PBC) and the hinge within the CNBD (Zelman et al. *Front Plant Sci.* 2012, 3:95); e, IQ motif, EF-hand binding site (InterPro: IPR000048).

Group: phylogenetic classification in Figure 1.

**Table S5.** List of the CNGC family genes in *Gossypium herbaceum*.

| Gene Name        | Gene ID     | Chr:Location(strand)          | AA   | pI    | D&M       | Group | Subcellular Localization     |
|------------------|-------------|-------------------------------|------|-------|-----------|-------|------------------------------|
| <i>GheCNGC1</i>  | Ghe01G07250 | Chr01:8894127..8901253(+)     | 709  | 8.73  | a,b,c,d   | IV-B  | Plasma membrane              |
| <i>GheCNGC2</i>  | Ghe01G27300 | Chr01:121183440..121185977(+) | 627  | 8.62  | a,b,c,d   | III   | Plasma membrane              |
| <i>GheCNGC3</i>  | Ghe02G04280 | Chr02:5055948..5058703(+)     | 496  | 8.23  | a,b,c,d   | III   | Chloroplast                  |
| <i>GheCNGC4</i>  | Ghe04G00530 | Chr04:619194..620813(-)       | 313  | 9.66  | b,d       | I     | Mitochondrial inner membrane |
| <i>GheCNGC5</i>  | Ghe04G05860 | Chr04:8878635..8881856(+)     | 695  | 6.20  | a,b,c,d   | IV-B  | Plasma membrane              |
| <i>GheCNGC6</i>  | Ghe04G06950 | Chr04:11684349..11686924(+)   | 579  | 6.20  | a,b,c,d   | III   | Chloroplast                  |
| <i>GheCNGC7</i>  | Ghe04G10960 | Chr04:29417675..29423996(-)   | 394  | 9.10  | a,b,d     | III   | Chloroplast                  |
| <i>GheCNGC8</i>  | Ghe05G05920 | Chr05:5479046..5495297(+)     | 1445 | 7.50  | a,b,c,d   | II    | Plasma membrane              |
| <i>GheCNGC9</i>  | Ghe05G11250 | Chr05:10302915..10305938(-)   | 510  | 8.66  | a,b,c,d   | III   | Chloroplast                  |
| <i>GheCNGC10</i> | Ghe05G12750 | Chr05:11861550..11865985(+)   | 713  | 8.54  | a,b,c,d,e | II    | Plasma membrane              |
| <i>GheCNGC11</i> | Ghe06G13600 | Chr06:46711807..46713030(-)   | 348  | 9.60  | a,b,d     | III   | Chloroplast                  |
| <i>GheCNGC12</i> | Ghe07G16730 | Chr07:31265588..31268395(-)   | 517  | 9.59  | a,b,c,d,e | I     | Mitochondrial inner membrane |
| <i>GheCNGC13</i> | Ghe08G12560 | Chr08:55213223..55361119(-)   | 524  | 7.42  | a,b,c,d   | I     | Chloroplast                  |
| <i>GheCNGC14</i> | Ghe09G01380 | Chr09:2706335..2713663(-)     | 714  | 8.80  | a,b,c,d   | IV-B  | Plasma membrane              |
| <i>GheCNGC15</i> | Ghe09G01390 | Chr09:2758562..2764089(+)     | 686  | 9.99  | a,b,c,d   | IV-B  | Plasma membrane              |
| <i>GheCNGC16</i> | Ghe09G21870 | Chr09:76207315..76208906(-)   | 446  | 8.16  | a,b,c,d   | III   | Chloroplast                  |
| <i>GheCNGC17</i> | Ghe11G00200 | Chr11:208294..230215(-)       | 786  | 8.42  | a,b,c,d   | IV-A  | Plasma membrane              |
| <i>GheCNGC18</i> | Ghe12G15190 | Chr12:80976907..80982067(+)   | 731  | 10.11 | a,b,c,d,e | I     | Plasma membrane              |
| <i>GheCNGC19</i> | Ghe13G24840 | Chr13:111635813..111637449(+) | 355  | 9.28  | a,b,d     | III   | Chloroplast                  |
| <i>GheCNGC20</i> | Ghe13G25210 | Chr13:111969677..111974253(+) | 541  | 8.62  | a,b,c,d,e | II    | Nuclear                      |

Note: *Gossypium herbaceum* (A<sub>1</sub>) genome WHU Assembly v1.0 & Annotation v1.0.

Chr:Location(strand): chromosome & location (start..end) & strand.

AA: amino acids.

pI: isoelectric point.

D&M: domains & motif. a, transmembrane domains (TM); b, cyclic nucleotide-binding domain (CNBD) (InterPro: IPR000595, IPR018490); c, ion transport domain (ITP) (InterPro: IPR005821); d, plant CNGC-specific motif spanning the putative phosphate binding cassette (PBC) and the hinge within the CNBD (Zelman et al. *Front Plant Sci.* 2012, 3:95); e, IQ motif, EF-hand binding site (InterPro: IPR000048).

Group: phylogenetic classification in Figure 1.

**Table S6.** List of the CNGC family genes in *Gossypium raimondii*

| Gene name       | Gene ID          | Chr:Location(strand)        | AA  | pI   | D&M <sup>s</sup> | Group | Subcellular localization |
|-----------------|------------------|-----------------------------|-----|------|------------------|-------|--------------------------|
| <i>GrCNGC1</i>  | Gorai.001G155300 | Chr01:21774055..21777693(-) | 712 | 9.34 | a,b,c,d,e        | I     | Plasma membrane          |
| <i>GrCNGC2</i>  | Gorai.002G076600 | Chr02:9066932..9074583(+)   | 709 | 9.02 | a,b,c,d          | IVB   | Plasma membrane          |
| <i>GrCNGC3</i>  | Gorai.002G248200 | Chr02:61219773..61222311(+) | 698 | 9.10 | a,b,c,d          | III   | Plasma membrane          |
| <i>GrCNGC4</i>  | Gorai.003G143300 | Chr03:40840047..40843299(-) | 708 | 9.16 | a,b,c,d          | III   | Plasma membrane          |
| <i>GrCNGC5</i>  | Gorai.004G115300 | Chr04:27570395..27576917(-) | 582 | 8.78 | a,b,c,d          | I     | Plasma membrane          |
| <i>GrCNGC6</i>  | Gorai.006G012500 | Chr06:2655669..2661881(-)   | 688 | 9.34 | a,b,c,d          | IVB   | Plasma membrane          |
| <i>GrCNGC7</i>  | Gorai.006G012600 | Chr06:2689723..2695126(+)   | 766 | 9.53 | a,b,c,d          | IVB   | Plasma membrane          |
| <i>GrCNGC8</i>  | Gorai.006G187100 | Chr06:44397567..44400915(-) | 692 | 9.07 | a,b,c,d          | III   | Plasma membrane          |
| <i>GrCNGC9</i>  | Gorai.007G002000 | Chr07:201004..215206(-)     | 770 | 9.29 | a,b,c,d          | IVA   | Plasma membrane          |
| <i>GrCNGC10</i> | Gorai.008G124800 | Chr08:36428101..36434147(+) | 719 | 9.54 | a,b,c,d,e        | I     | Plasma membrane          |
| <i>GrCNGC11</i> | Gorai.009G056700 | Chr09:4097678..4103911(+)   | 745 | 9.19 | a,b,c,d,e        | II    | Plasma membrane          |
| <i>GrCNGC12</i> | Gorai.009G108500 | Chr09:7879763..7884030(-)   | 715 | 9.21 | a,b,c,d          | III   | Plasma membrane          |
| <i>GrCNGC13</i> | Gorai.009G123300 | Chr09:9200673..9206164(+)   | 746 | 9.00 | a,b,c,d,e        | II    | Plasma membrane          |
| <i>GrCNGC14</i> | Gorai.010G121000 | Chr10:24503137..24509026(-) | 709 | 9.13 | a,b,c,d          | III   | Plasma membrane          |
| <i>GrCNGC15</i> | Gorai.010G245300 | Chr10:61428605..61431508(-) | 641 | 9.25 | a,b,c,d          | III   | Plasma membrane          |
| <i>GrCNGC16</i> | Gorai.012G003500 | Chr12:416603..423954(-)     | 712 | 9.10 | a,b,c,d          | I     | Plasma membrane          |
| <i>GrCNGC17</i> | Gorai.012G050600 | Chr12:6577438..6580915(+)   | 695 | 9.41 | a,b,c,d          | IVB   | Plasma membrane          |
| <i>GrCNGC18</i> | Gorai.012G060800 | Chr12:8516862..8519426(+)   | 714 | 6.53 | a,b,c,d          | III   | Plasma membrane          |
| <i>GrCNGC19</i> | Gorai.012G095800 | Chr12:17638792..17646002(-) | 738 | 9.25 | a,b,c,d          | III   | Plasma membrane          |
| <i>GrCNGC20</i> | Gorai.013G215800 | Chr13:53579111..53585314(+) | 743 | 9.01 | a,b,c,d,e        | II    | Plasma membrane          |

Note: *Gossypium raimondii* (D<sub>5</sub>) genome JGI Assembly v2.0 & Annotation v2.1.

Chr:Location(strand): chromosome & location (start..end) & strand.

AA: amino acids.

pI: isoelectric point.

D&M: domains & motif. a, transmembrane domains (TM); b, cyclic nucleotide-binding domain (CNBD) (InterPro: IPR000595, IPR018490); c, ion transport domain (ITP) (InterPro: IPR005821); d, plant CNGC-specific motif spanning the putative phosphate binding cassette (PBC) and the hinge within the CNBD (Zelman et al. *Front Plant Sci.* 2012, 3:95); e, IQ motif, EF-hand binding site (InterPro: IPR000048).

Group: phylogenetic classification in Figure 1.
