# Supplementary material for: Dynamic Expression, Differential Regulation and Functional Diversity of the CNGC Family Genes in Cotton
Source: MDPI journal article supplement (doi:10.3390/ijms23042041), 2022-02-12
Supplement: s1 [file s1]

**Table S1.** Primers used in this study.

| Gene Name       | Sequence (5'→3')                                                                | Size (bp) |
|-----------------|---------------------------------------------------------------------------------|-----------|
| <i>GhCNGC1</i>  | Forward: TTATTGCAATAATGATGAATTAGGTTC<br>Reverse: ATGAGAGAGTGTCTGAATATAAACATAC   | 112       |
| <i>GhCNGC2</i>  | Forward: AGTTTTGGTGATTACTAGTGTAGTT<br>Reverse: ATACTCCTGGTTTGAGTTTATCTG         | 83        |
| <i>GhCNGC3</i>  | Forward: TAATCAATGGAGTCAAGTAAGACTAAG<br>Reverse: TCGGTTTCATCACGATTTTTAATTTCG    | 112       |
| <i>GhCNGC4</i>  | Forward: CTGAATCCACTCCTGAAAAGAATCC<br>Reverse: TGTCTCTACAAGTTGCAGTGTGATG        | 138       |
| <i>GhCNGC5</i>  | Forward: AGTTAAGTCCTCGTAAGTTACGAGT<br>Reverse: GTATGCATTCTTGGTTGAACTCTCA        | 136       |
| <i>GhCNGC6</i>  | Forward: CGGTTTTGATTGGTGTGCGCTG<br>Reverse: GGCCGGTGCAATCGATACGTAC              | 99        |
| <i>GhCNGC7</i>  | Forward: AGTTGAGTGATTGAAATGAAACCAATAT<br>Reverse: ATGTTTCAGATCCATCCATCCAATTTATT | 139       |
| <i>GhCNGC8</i>  | Forward: TGAAATGCAATCCACCATACAGGA<br>Reverse: AACGTGGAAATCATAGGACATAGT          | 124       |
| <i>GhCNGC9</i>  | Forward: CTGTCAAATAAGTAGTCCGCATAAC<br>Reverse: CAATGGGGTAACAAGATAATCTAAG        | 141       |
| <i>GhCNGC10</i> | Forward: AATCTTGGACAGCTGGTACACC<br>Reverse: ATATTGGTACACCGGTGATTACG             | 171       |
| <i>GhCNGC11</i> | Forward: TGCATAAAGAGTGGCTCCGAGAC<br>Reverse: TTCGTGAAGCAGAGGATAAGCTG            | 101       |
| <i>GhCNGC12</i> | Forward: ACTCCTCCATTCGAGACAGTGA<br>Reverse: GCATGGACCGTGACAAATATAC              | 152       |
| <i>GhCNGC13</i> | Forward: AGTACGCACAAGACCATTTCATCAA<br>Reverse: ATCGACCGAGACGAATAAAGAATAG        | 143       |
| <i>GhCNGC14</i> | Forward: CTCAATCAATGGCGTATTTTCATATCA<br>Reverse: TGTCATACACTGCGAGAAATAACTCA     | 194       |
| <i>GhCNGC15</i> | Forward: CAAATCAACTTATGGGGTCAATTATG<br>Reverse: GAGATTTTTACATTTTCGGATAATTCAA    | 108       |
| <i>GhCNGC16</i> | Forward: TCAGAATATTCACCGCCCTTATC<br>Reverse: AACTCAGAGGTTTACAAGTCAAGA           | 152       |
| <i>GhCNGC17</i> | Forward: GAAAACGATTGATTCATGTTAGTATCA<br>Reverse: TACATTGTAGCAAGAGTTCGATTAC      | 188       |
| <i>GhCNGC18</i> | Forward: CATATCCGACACTCTCTCGTATCTG<br>Reverse: CCACTTTTCTGCTTTAGAGACACTC        | 188       |
| <i>GhCNGC19</i> | Forward: ATGAAAAGAAAAAATGTATGGTGACTA<br>Reverse: TTAGACTCCTGGTAAAGCAACACT       | 112       |
| <i>GhCNGC20</i> | Forward: TTTGGATAAAGGAGAACTTAAGTATA<br>Reverse: GTGTAGGTATTATTAGTCAGTGAACAA     | 145       |
| <i>GhCNGC21</i> | Forward: ATGCAGGAGCAGCCGAAGTCA<br>Reverse: AGGGTTCATAAATGCGCCAACA               | 123       |
| <i>GhCNGC22</i> | Forward: ATGGGACATGGTACTCCACTAA<br>Reverse: CGGAATCCACCGTTAAGTACAA              | 105       |
| <i>GhCNGC23</i> | Forward: ATAAGATGAAATACAAGTAAAGCCATA                                            | 162       |

|                            |                                      |     |
|----------------------------|--------------------------------------|-----|
|                            | Reverse: AGTTGAGTGAGTGTTGATGTAATTTA  |     |
| <i>GhCNGC24</i>            | Forward: CTATCGGTTAGGAAGAAAGACGA     | 67  |
|                            | Reverse: TGGGCTGCTTTGTTTGTAGTCAA     |     |
| <i>GhCNGC25</i>            | Forward: TCTCTACAAGTTGCAGTGTGATGA    | 138 |
|                            | Reverse: CTGAAC TCACTCCTGAAATTTACA   |     |
| <i>GhCNGC26</i>            | Forward: AATATATCATTTCCAGTTAAGTCCTA  | 151 |
|                            | Reverse: AATTCAAGTAATCAACATCCTTCCAT  |     |
| <i>GhCNGC27</i>            | Forward: TGAAATCATCGTGGTTGGTTAATCA   | 159 |
|                            | Reverse: GGTGCACCATGTTCCGTACGA       |     |
| <i>GhCNGC28</i>            | Forward: GATTCAATAATGTTAAAAAGTGTGACA | 169 |
|                            | Reverse: TATATATGGGCACTAAAGAACGGCA   |     |
| <i>GhCNGC29</i>            | Forward: TTCCGCCAATTACCAGCGACA       | 145 |
|                            | Reverse: AAGTCAAGGGAAGAGCCTGCA       |     |
| <i>GhCNGC30</i>            | Forward: ATCGTACTTGACACTAATATCAACA   | 184 |
|                            | Reverse: TTCCTGACAATTTAGTGCTCCTTA    |     |
| <i>GhCNGC31</i>            | Forward: TTA CTCCACCTCAACCTGATTCA    | 146 |
|                            | Reverse: GTGCATGGACCGTGACAGATATA     |     |
| <i>GhCNGC32</i>            | Forward: GCTGTGCTAAACACGAGTATATGT    | 142 |
|                            | Reverse: CTACGATGACCTCAAGTCTAAGAA    |     |
| <i>GhCNGC33</i>            | Forward: AGAATATAAAGCCCTTGCCAACGCA   | 71  |
|                            | Reverse: GTTTGAGAGAACTTGCAACTCAGATA  |     |
| <i>GhCNGC34</i>            | Forward: ACCTGGTTAAAGCTGAATTGGGTA    | 142 |
|                            | Reverse: TTTGAGTCATTGCTTCTTCTTCTTA   |     |
| <i>GhCNGC35</i>            | Forward: TATTGCAACTCGCTTGAAAGAAC     | 134 |
|                            | Reverse: CAGCTACTGTTTGAGTCAGGA       |     |
| <i>GhCNGC36</i>            | Forward: TCAATAACAATGGCAGTAGTACAGA   | 118 |
|                            | Reverse: GGAATTCTACTATTACTATTACTATCA |     |
| <i>GhCNGC37</i>            | Forward: CAGTTTGGAATACAGTTGTAAGTA    | 80  |
|                            | Reverse: TAGGCATAAGAATTAATGAAGCAAC   |     |
| <i>GhCNGC38</i>            | Forward: GTGGAACCAAATGATATGACACCA    | 143 |
|                            | Reverse: ACCAGTCTGACAACCATCCTGTTA    |     |
| <i>GhCNGC39</i>            | Forward: CTCAAACATAATCACATAGGATCGA   | 120 |
|                            | Reverse: AAAGAAAACGTAGCATGCTTATAG    |     |
| <i>GhCNGC40</i>            | Forward: CATCATATACAGACCTCATACTCA    | 137 |
|                            | Reverse: GCAGGTAGGTGAGAGACTTA        |     |
| <i>GhACT7</i>              | Forward: GATTCCGGTGACGGTGTTTC        | 152 |
|                            | Reverse: GCAGTGGTGGTGAACATGTAAC      |     |
| <i>GhUBQ7</i>              | Forward: CGAGTCTTCGGACACCATTGA       | 258 |
|                            | Reverse: GGACAGCGAGCTTGACCTTC        |     |
| <i>GhCNGC1&amp;18 (1)</i>  | Forward: ATCCTTCACGTGCAACGCCCATGCA   | 439 |
|                            | Reverse: CTCTTGATCATTTTGAGCTGGAGGCAC |     |
| <i>GhCNGC1&amp;18 (2)</i>  | Forward: GACCCAGTACAAAGAATGCTAT      | 400 |
|                            | Reverse: TCCGAGGCCTAATGAATGACA       |     |
| <i>GhCNGC12&amp;31 (1)</i> | Forward: TGAGAGAGGAACAATACAAGCTA     | 473 |
|                            | Reverse: GAGAATCTTAACAGCGAGAGAGT     |     |
| <i>GhCNGC12&amp;31 (2)</i> | Forward: AAGGAGATCCGGTGCTACGA        | 425 |
|                            | Reverse: TAAGTCGATCTTCACTTCCACCA     |     |
| <i>GhPRI</i>               | Forward: AAGAATGTGGGTTAGTGAGAGGGT    | 90  |

|               |                                  |     |
|---------------|----------------------------------|-----|
| <i>GhPR3</i>  | Reverse: ACCACTTGAGTATAATGCCCCGC | 172 |
|               | Forward: GATGACTCCACAATCACCGAAGC |     |
| <i>Vd ITS</i> | Reverse: GCGGTCTTCTACCTGGGCATT   | 129 |
|               | Forward: CGGTGTTGGGGATCTACGTC    |     |
|               | Reverse: CGGGCTTGTAGGGGGTTTAG    |     |

---
